# Supplementary material for: Analysis of Drugs in Saliva of US Military Veterans Treated for Substance Use Disorders Using Supported Liquid Extraction and Surface-Enhanced Raman Spectral Analysis
Source: MDPI journal article supplement (doi:10.3390/molecules28052010), 2023-02-21
Supplement: s1 [file s1]

# Supplementary Materials: Analysis of drugs in saliva of USA military veterans treated for substance-related disorders using supported liquid extraction and surface-enhanced Raman spectral analysis

Stuart Farquharson, Chetan Shende, Jenelle Newcomb, Ismene L. Petrakis and Albert J. Arias.

Table S1. Subject demographics, saliva and urine sampling times, daily buprenorphine dose, urinalysis, and other drugs used.

| Sub ID Number | Race                   | Gender | Age | Vet/ Non-Vet | Date of Saliva Sample | Time of Saliva Sample | Date Saliva Sample Sent for Analysis | Date of Urine Sample | Time of Urine Sample | Daily BUP Dose              | Urinalysis                                | Drugs used within 4 days of collected sample |
|---------------|------------------------|--------|-----|--------------|-----------------------|-----------------------|--------------------------------------|----------------------|----------------------|-----------------------------|-------------------------------------------|----------------------------------------------|
| 1             | Caucasian              | M      | 65  | V            | 6/26/2018             | 3:45PM                | 6/29/2018                            | 6/26/2018            | 2:45PM               | 24mg                        | Positive: BUP                             | BUP                                          |
| 2             | Caucasian              | M      | 65  | V            | 6/26/2018             | 1:45PM                | 6/29/2018                            | 6/26/2018            | 2:25PM               | 20mg                        | Positive: BUP, cannabinoids               | BUP, marijuana                               |
| 3             | Caucasian              | M      | 58  | V            | 6/26/2018             | 1:35 PM               | 6/29/2018                            | 6/26/2018            | 2:30PM               | 8mg                         | Positive: BUP, amphetamines, cannabinoids | BUP, klonopin, marijuana                     |
| 4             | Caucasian              | M      | 59  | V            | 6/26/2018             | 1:30PM                | 6/29/2018                            | 6/26/2018            | 1:15PM               | 24mg                        | Positive: BUP                             | BUP                                          |
| 5             | Caucasian              | M      | 62  | V            | 6/25/2018             | 12:00PM               | 6/29/2018                            | 6/25/2018            | 10:00AM              | 20mg                        | Positive: BUP                             | BUP                                          |
| 6             | Caucasian              | M      | 45  | V            | 6/25/2018             | 11:45AM               | 6/29/2018                            | 6/25/2018            | 11:45AM              | 16mg                        | Positive: BUP                             | BUP                                          |
| 7             | AA                     | M      | 63  | V            | 6/25/2018             | 2:45PM                | 6/29/2018                            | 6/25/2018            | 2:40PM               | 20mg                        | Positive: BUP                             | BUP                                          |
| 8             | AA                     | M      | 58  | V            | 6/25/2018             | 10:45 AM              | 6/29/2018                            | 6/25/2018            | 10:45 AM             | 20mg                        | Positive: BUP                             | BUP                                          |
| 9             | Hispanic               | M      | 65  | V            | 6/25/2018             | 9:40AM                | 6/29/2018                            | 6/25/2018            | 9:00AM               | 16mg                        | Positive: BUP, cannabinoids               | BUP, marijuana                               |
| 10            | Caucasian              | M      | 42  | V            | 6/25/2018             | 9:20AM                | 6/29/2018                            | 6/25/2018            | 8:45AM               | 8mg                         | Positive: BUP, cannabinoids               | BUP, marijuana                               |
| 11            | AA                     | M      | 63  | V            | 6/25/2018             | 9:10AM                | 6/29/2018                            | 6/25/2018            | 8:45AM               | 24mg                        | Positive: BUP                             | BUP                                          |
| 12            | AA                     | M      | 59  | V            | 6/22/2018             | 1:40PM                | 6/29/2018                            | 6/22/2018            | 12:00PM              | 8mg                         | Positive: BUP, opiates, methadone         | BUP, heroin                                  |
| 13            | declined to state race | M      | 46  | V            | 6/22/2018             | 12:26 PM              | 6/29/2018                            | 6/22/2018            | 12:28PM              | 24mg                        | Positive: BUP, cannabinoids               | BUP                                          |
| 14            | Hispanic               | M      | 60  | V            | 6/21/2018             | 1:25PM                | 6/29/2018                            | 6/21/2018            |                      | 24mg                        | Positive: BUP                             | BUP                                          |
| 15            | Caucasian              | M      | 44  | V            | 6/21/2018             | 12:25PM               | 6/29/2018                            | 6/21/2018            | 11:30AM              | 8mg                         | Positive: BUP                             | BUP                                          |
| 16            | Caucasian              | M      | 44  | V            | 6/21/2018             | 11:40AM               | 6/29/2018                            | 6/21/2018            |                      | 8mg (started day of sample) | Positive: opiates                         | BUP (started same day as                     |
| 17            | Caucasian              | M      | 36  | V            | 6/21/2018             | 11:35 AM              | 6/29/2018                            | 6/21/2018            | 11:30AM              | 20mg                        | Positive: BUP, cocaine                    | BUP                                          |
| 18            | AA                     | M      | 65  | V            | 6/21/2018             | 10:40 AM              | 6/29/2018                            | 6/21/2018            | 9:30 AM              | 8mg                         | Positive: BUP, opiates                    | BUP, heroin                                  |
| 19            | Caucasian              | M      | 30  | V            | 6/21/2018             | 10:22 AM              | 6/29/2018                            | 6/21/2018            | 10:25 AM             | 24mg                        | Positive: BUP                             | BUP                                          |
| 20            | Caucasian              | M      | 49  | V            | 6/20/2018             | 1:55 PM               | 6/29/2018                            | 6/20/2018            | 12:00 PM             | 12mg                        | Positive: BUP, cannabinoids, cocaine      | BUP, marijuana, cocaine                      |

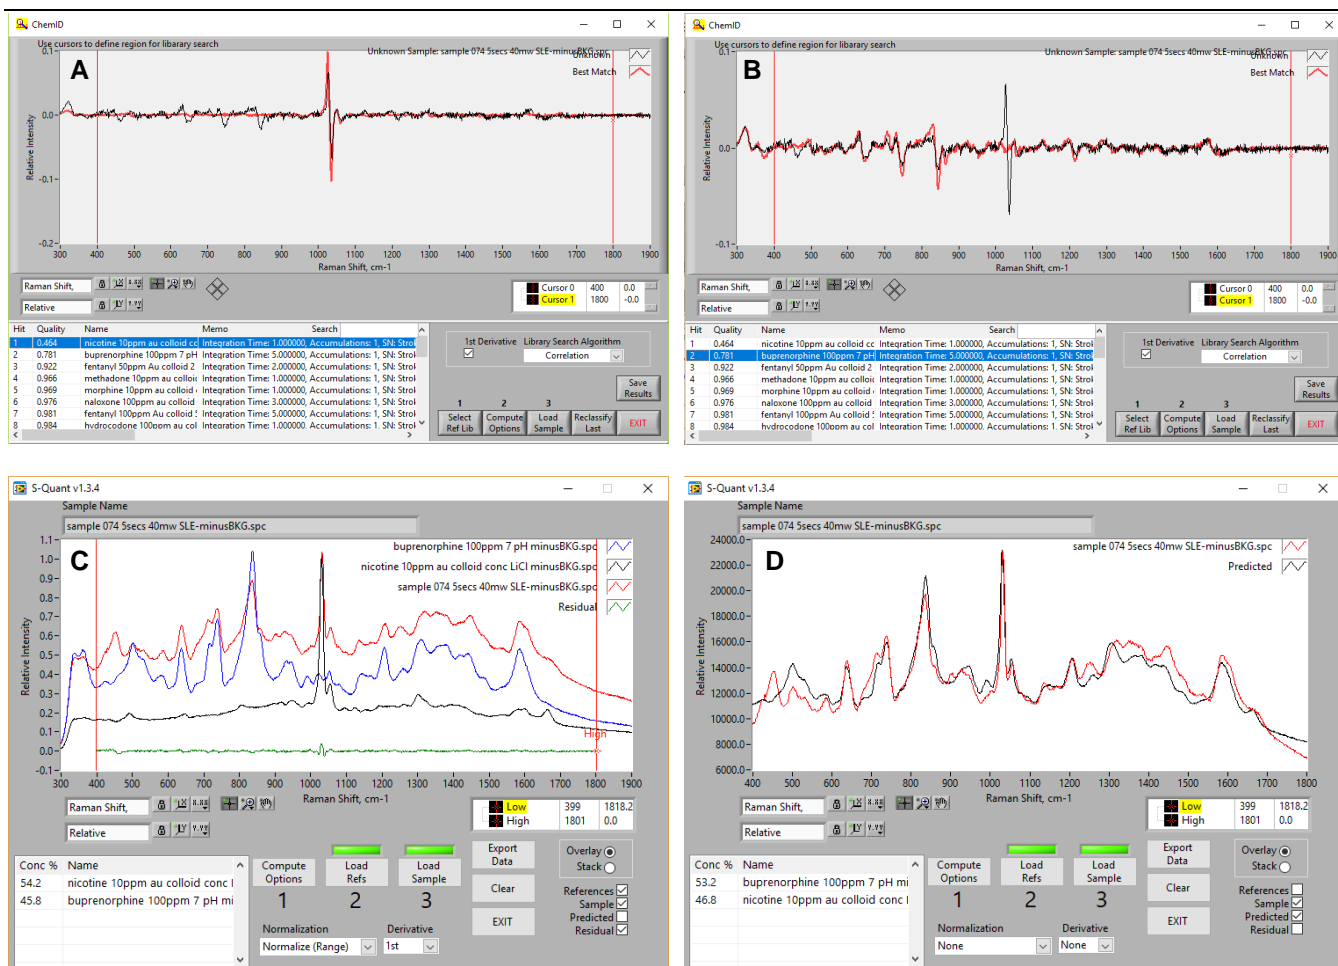

Figure S1. Images of Chem-ID software comparing Sample 1 to A) the first “Hit” nicotine, and B) the second “Hit” buprenorphine; and S-Quant software indicating the percent contribution for these two drugs using C) first derivative spectra and D) normal (untreated spectra). Spectral range used for analysis for all samples: 400 to 1800  $\text{cm}^{-1}$ . Conditions: 100 mg/L sample in water, 40 mW at 785 nm, 1 sec acquisition.

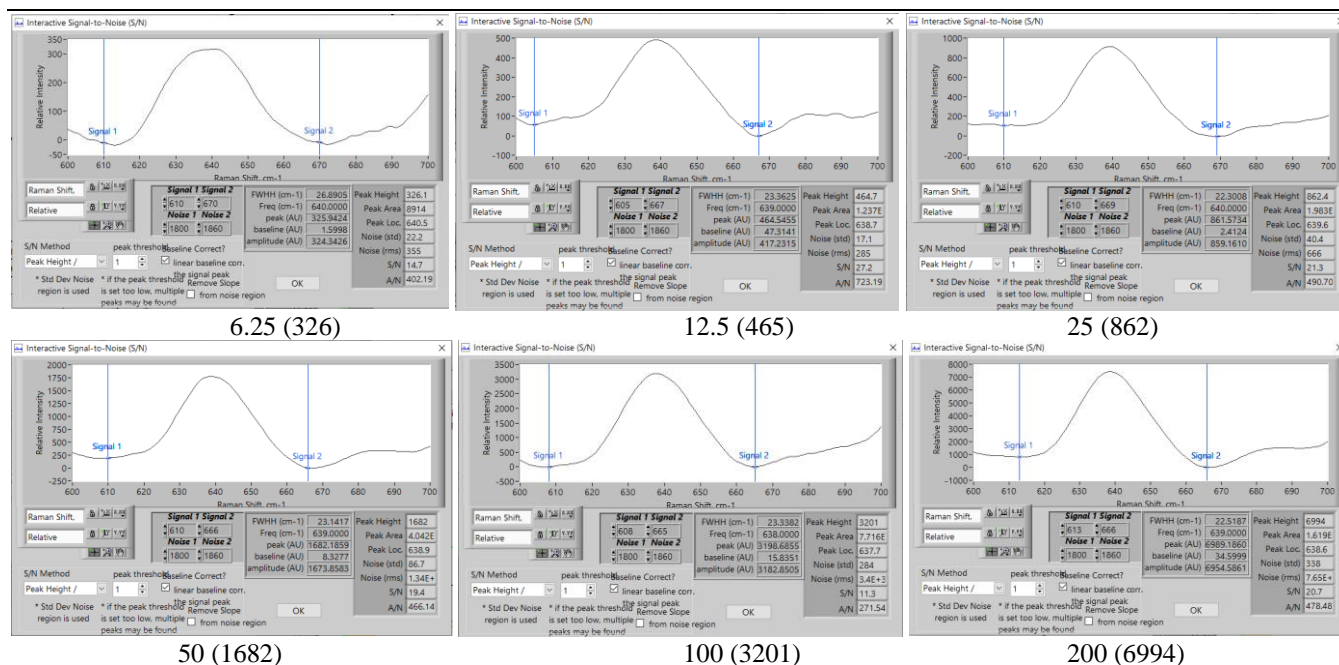

Figure S2. Spectra of samples for buprenorphine concentration calibration curve. Peak heights indicated in parentheses. Conditions as in Figure S1.

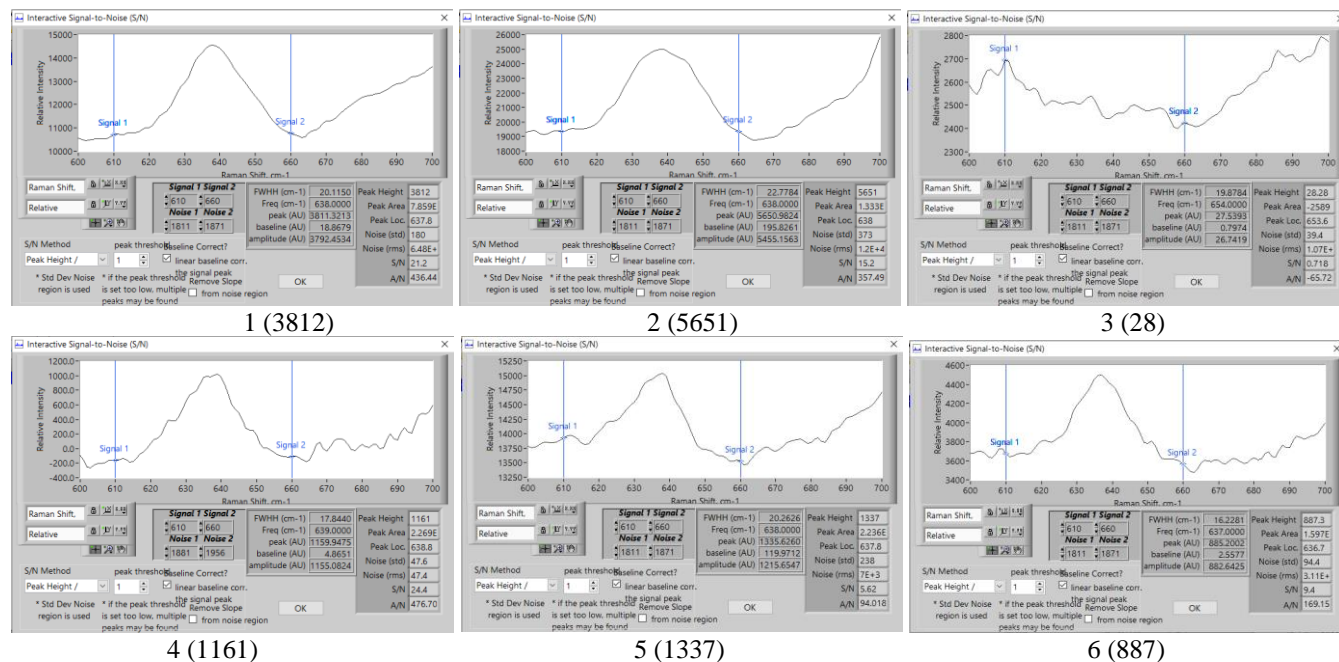

Figure S3a. Signal-to-noise software used to determine peak height with a baseline from 620 to 660  $\text{cm}^{-1}$  for Samples 1-6. Peak heights indicated in parentheses. Conditions as in Figure S1.

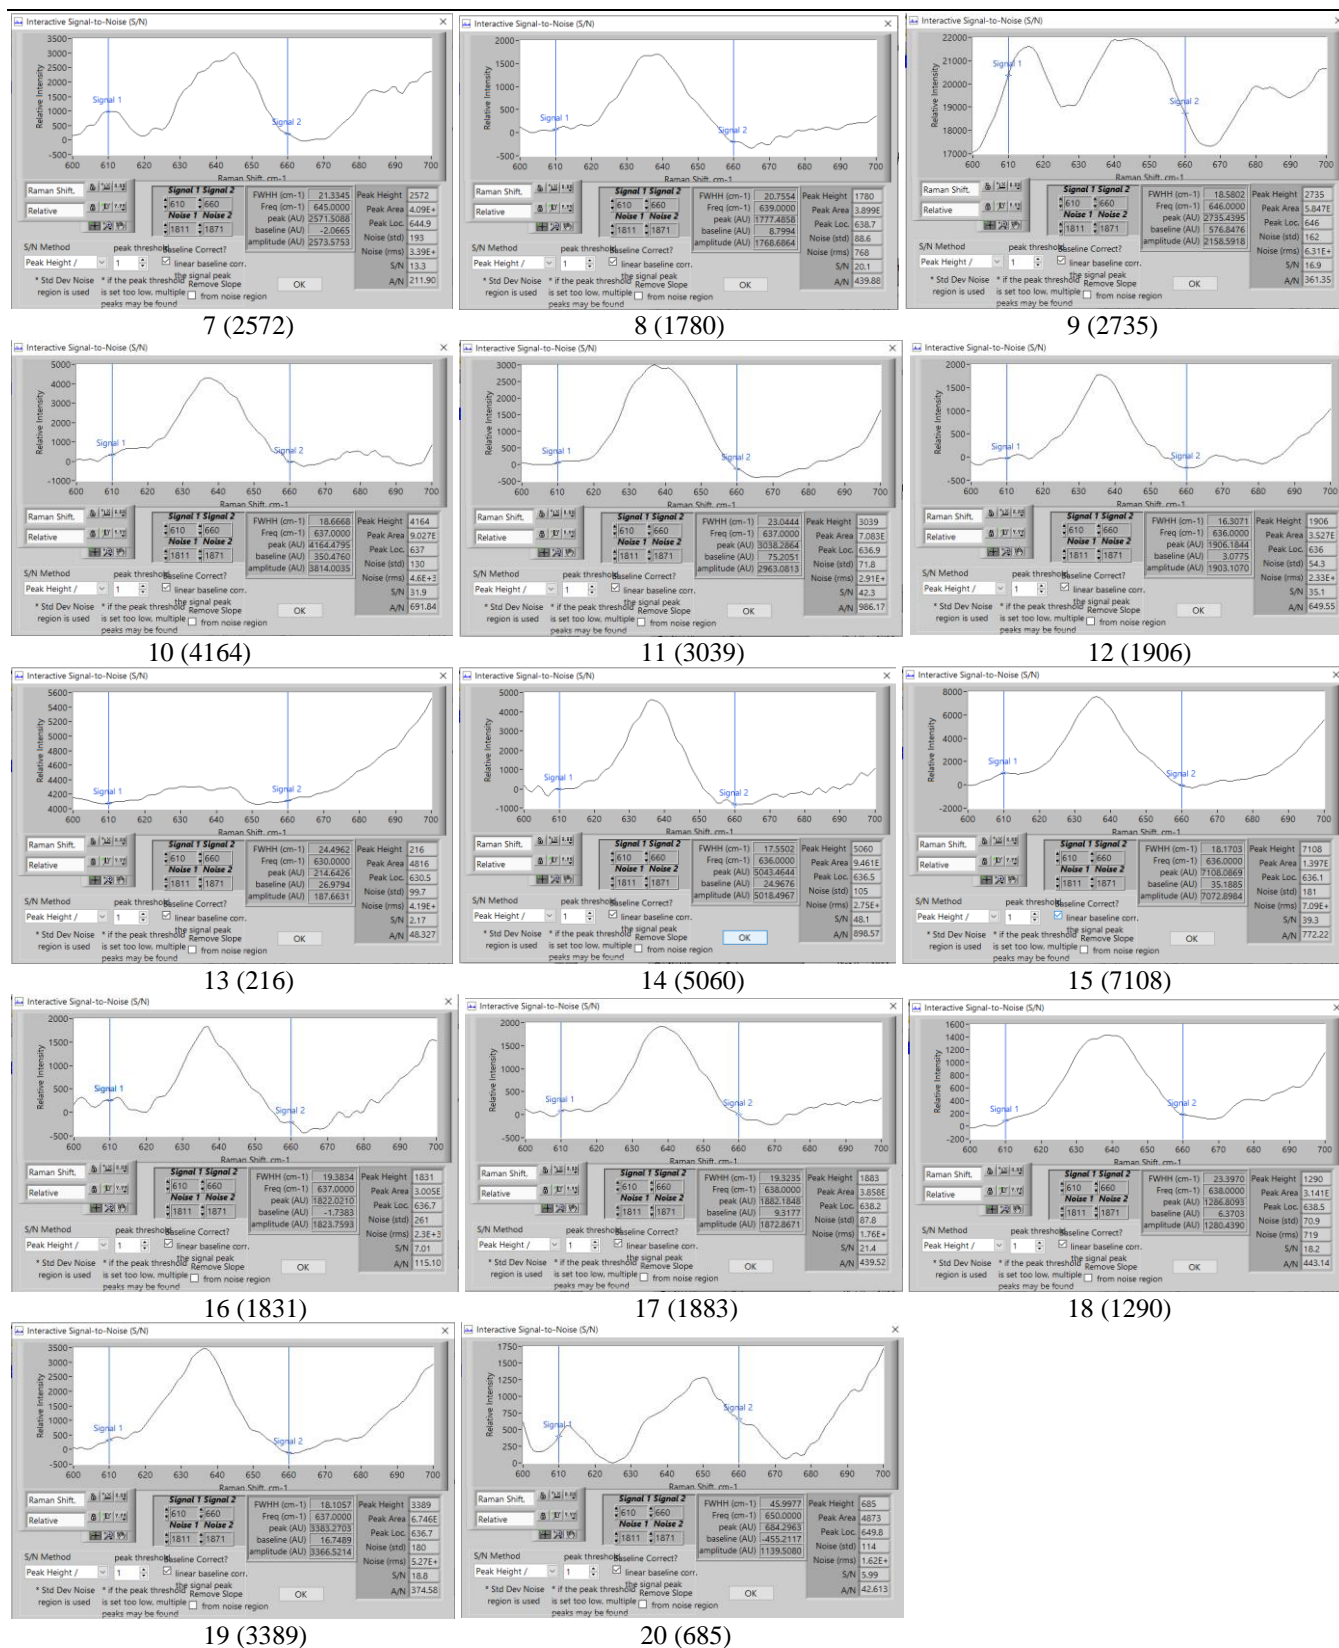

Figure S3b. Signal-to-noise software used to determine peak height with a baseline from 620 to 660 cm<sup>-1</sup> for Samples 7-20. Peak heights indicated in parentheses. Conditions as in Figure S1.



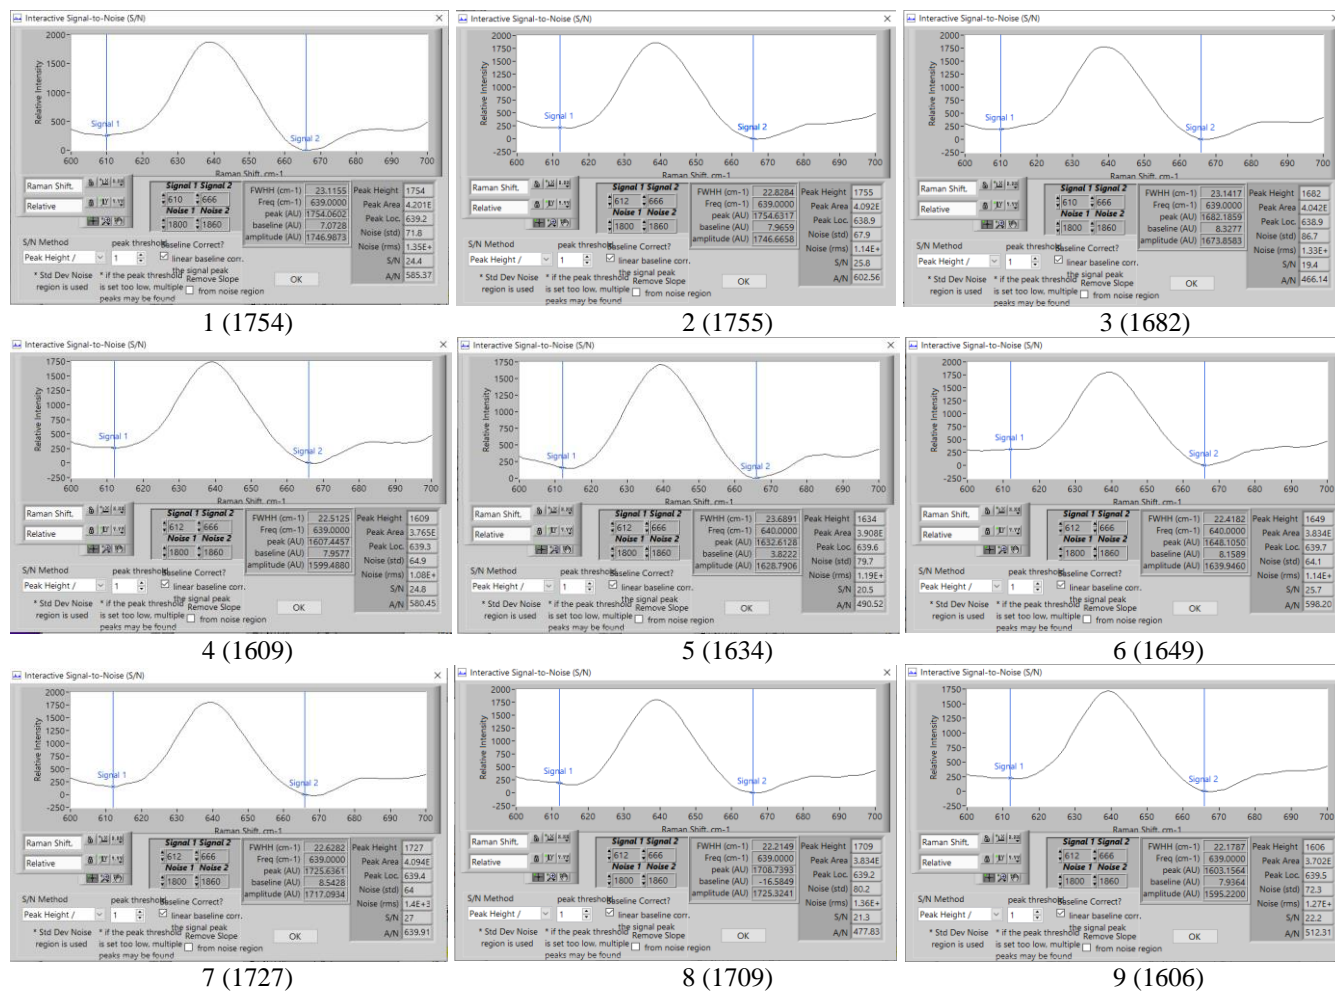

Figure S4. Nine repeat analyses for a 50 ng/mL prepared sample that included SLE preparation and SERS measurements. Peak heights indicated in parentheses. Conditions as in Figure S1.
